# Supplementary material for: Genotypic and Phenotypic Selection of Newly Improved Putra Rice and the Correlations among Quantitative Traits
Source: MDPI journal article supplement (doi:10.3390/d14100812), 2022-09-28
Supplement: s1 [file s1]

**Table S1.** Bacterial leaf blight resistance genes in IRBB60 and blast resistance genes in Putra-1 and their linked markers.

| s/n          | Gene            | Chromo-Some | Linked marker | Primer sequence                                                | Reference |
|--------------|-----------------|-------------|---------------|----------------------------------------------------------------|-----------|
| <b>BLB</b>   |                 |             |               |                                                                |           |
| 1.           | <i>Xa5</i>      | 5           | RM122         | F: GAGTCGATGTAATGTCATCAGTGC<br>R: GAAGGAGGTATCGCTTTGTTGGAC     | [59,60]   |
| 2.           | <i>Xa13</i>     | 8           | Xa-13prom     | F: GGCCATGGCTCAGTGTAT<br>R: GAGCTCCAGCTCTCCAAATG               | [61–63]   |
| 3.           | <i>Xa5</i>      | 5           | RM13          | F: TCCAACATGGCAAGAGAGAG<br>R: GGTGGCATTTCGATTCCAG              | [64,65]   |
| 4.           | <i>Xa5</i>      | 5           | RG556         | F: TAG CTG CTG CCG TGC TGT GC<br>R: AAT ATT TCA GTG TGC ATC TC | [63,66]   |
| 5.           | <i>Xa13</i>     | 8           | RG136         | F: TCCCAGAAAGCTACTACAGC<br>R: GCAGACTCCAGTTTGACTTC             | [61]      |
| 6.           | <i>Xa21</i>     | 11          | pTA248        | F: AGACGCGGAAGGGTGGTTCCCGGA<br>R: AGACGCGGAATCGAAGATGAAA       | [63,67]   |
| 7.           | <i>Xa5</i>      | 11          | RM21          | F: ACAGTATTCCGTAGGCACGG<br>R: GCTCCATGAGGGTGGTAGAG             | [68]      |
| 8.           | <i>Xa13</i>     | 8           | RM230         | F: GCCAGACCGTGGATGTTC<br>R: CACCGCAGTCACTTTTCAAG               | [68]      |
| 9.           | <i>Xa5</i>      | 5           | RM390         | F: CCCTTGTTTCAGTGGCTCAG<br>R: CCAAGATCAAGAACAGCAGGAATC         | [68]      |
| 10.          | <i>Xa5</i>      | 5           | Xa5S          | F: GTCTGGAATTTGCTCGCGTTCG<br>R: TGGTAAAGTAGATACCTTATCAAACCTGGA | [69,70]   |
| 11.          | <i>Xa5</i>      | 5           | Xa5R          | F: AGCTCGCCATTCAAGTTCTTGAG<br>R: TGACTTGGTTCTCCAAGGCTT         | [69]      |
| 12.          | <i>Xa21</i>     | 12          | Xa21FR        | F: TCCAACATGGCAAGAGAGAG<br>R: GGTGGCATTTCGATTCCAG              | [69]      |
| 13.          | <i>Xa4</i>      | 11          | RM224         | F: ATCGATCGATCTTCACGAGG<br>R: TGCTATAAAAGGCATTTCGGG            | [64]      |
| 14.          | <i>Xa13</i>     | 8           | STS-RG136     | F: TCCCAGAAAGCTACTACAGC<br>R: GCAGACTCCAGTTTGACTTC             | [71,72]   |
| 15.          | <i>Xa4</i>      | 4           | MP1, MP2      | F: ATCGATCGATCTTCACGAGG<br>R: TCGTATAAAAGGCATTTCGGG            | [73]      |
| <b>Blast</b> |                 |             |               |                                                                |           |
| 16.          | <i>Piz</i>      | 6           | RM8255        | ATGCGTGTTTCAGAAATTAGG<br>TTGTTGTATACCTCATCGACAG                | [74]      |
| 17.          | <i>Pi2, Pi9</i> | 6           | RM6836        | TGTTGCATATGGTGCTATTGA<br>GATACGGCTTCTAGGCCAAA                  | [74]      |

**Table S2.** Polymorphic background markers and their SSR details.

| S/n | Marker | Chro. | Genetic distance (cM) | Anneal. temp. | Repeat Motif            | Genomic DNA | Primer Sequence (F)  | Primer Sequence (R)          | Exptd. band size |
|-----|--------|-------|-----------------------|---------------|-------------------------|-------------|----------------------|------------------------------|------------------|
| 1   | RM72   | 8,7   | 39.7                  | 55            | (TAT)5C(ATT)<br>15      | AF344086    | CCGGCGATAAAACAATGAG  | GCATCGGTCCTAACTAAGG<br>G     | 166              |
| 2   | RM10   | 7     | 63.5                  | 55            | (GA)15                  | AF344012    | TTGTCAAGAGGAGGCATCG  | CAGAATGGGAAATGGGTCC          | 159              |
| 3   | RM3761 | 8     | 112.6                 | 50            | (GA)18                  | AY02043     | CCTCAACAATAGCACCACC  | CTGCAAGTCTGCAAGCACA<br>G     | 177              |
| 4   | RM1261 | 12    | 61.6                  | 50            | (AG)16                  | AY01793     | GTCCATGCCCAAGACACAA  | GTTACATCATGGGTGACCC<br>C     | 167              |
| 5   | RM561  | 2     | 74.1                  | 55            | (GA)11                  | AQ91330     | GAGCTGTTTTGGACTACGG  | GAGTAGCTTTCTCCACCCC<br>C     | 190              |
| 6   | RM415  | 12    | 0.0                   | 55            | (AT)21                  | AQ15904     | CTTCGATCCATCATCCATG  | ATTGCTGTACGCAGTTTCGG<br>G    | 227              |
| 7   | RM333  | 10    | 110.4                 | 55            | (TAT)19(CTT)<br>19      | AF344157    | GTACGACTACGAGTGTAC   | GTCTTCGCGATCACTCGC<br>CAA    | 191              |
| 8   | RM272  | 1     | 28.7                  | 55            | (GA)9                   | AF344098    | AATTGGTAGAGAGGGGAG   | ACATGCCATTAGAGTCAGG<br>C     | 119              |
| 9   | RM211  | 2     | 14.4                  | 55            | (TC)3A(TC)18            | AF344032    | CCGATCTCATCAACCAACT  | CTTCACGAGGATCTCAAAG<br>G     | 161              |
| 10  | RM127  | 4     | 150.1                 | 55            | (AGG)8                  | D40108      | GTGGGATAGCTGCGTCGCG  | AGGCCAGGGTGTGGCATG<br>TCG    | 223              |
| 11  | RM6208 | 8     | 42.9                  | 55            | (CGG)8                  | AY02288     | TCGAGCAGTACGTGGATCT  | CACACGTACATCTGCAAGG<br>G     | 143              |
| 12  | RM410  | 9     | 79.3                  | 55            | (TA)13                  | AQ15644     | GCTCAACGTTTCGTTCTG   | GAAGATGCGTAAAGTGAAC<br>GG    | 183              |
| 13  | RM122  | 5     | 0.0                   |               | (GA)7A(GA)2<br>A (GA)11 |             | GAGTCGATGTAATGTCATC  | GAAGGAGGTATCGCTTTGT<br>AGTGC | 227              |
| 14  | RM3750 | 10    | 22                    | 61            | (GA)17                  | AY02042     | CCGACTTCGAAGTCCGAAC  | TCCAGCTGTCTCTTCCGC<br>5      | 166              |
| 15  | RM302  | 1     | 147.8                 | 55            | (GT)30(AT)8             | AF344127    | TCATGTCATCTACCATCAC  | ATGGAGAAGATGGAATACT<br>AC    | 156              |
| 16  | RM547  | 8     | 27.3                  | 55            | (ATT)19                 | AQ86608     | TAGGTTGGCAGACCTTTTC  | GTCAAGATCATCCTCGTAG<br>G     | 235              |
| 17  | RM432  | 7     | 43.5                  | 55            | (CATC)9                 | AQ27373     | TTCTGTCTCACGCTGGATTG | AGCTGCGTACGTGATGAAT<br>G     | 187              |
| 18  | RM3248 | 2     | 153.2                 | 55            | (CT)13                  | AY01992     | AGAAGGTTGCTTTCTTGGC  | CTTGCAAGGTCTGTTGCATC<br>C    | 197              |

Table S2 Cont'd.

| S/n | Marker  | Chro. | Genetic distance (cM) | Anneal. temp. | Repeat Motif | Genomic DNA | Primer Sequence (F)                           | Primer Sequence (R)        | Exptd. band size |
|-----|---------|-------|-----------------------|---------------|--------------|-------------|-----------------------------------------------|----------------------------|------------------|
| 19  | RM3843  | 4     | 108.2                 | 55            | (GA)23       | AY020518    | ACCCTACTCCCAACAGTCC<br>C                      | GGGGTCGTACGCTCATGTC        | 172              |
| 20  | RM130   | 3     | 208.2                 | 55            | (GA)10       | D40295      | TGTTGCTTGCCCTCACGCG<br>AAG                    | GGTCGCGTGCTTGGTTTGG<br>TTC | 85               |
| 21  | RM309   | 12    | 73                    | 55            | (GT)13       | AF344134    | GTAGATCACGCACCTTTCT<br>GG                     | AGAAGGCCTCCGGTGAAG         | 169              |
| 22  | RM336   | 7     | 80                    | 55            | (CTT)18      | AF344160    | CTTACAGAGAAACGGCAT<br>CG                      | GCTGGTTTGTTCAGGTTC<br>G    | 154              |
| 23  | RM573   | 2     | 131.8                 | 55            | (GA)11       | AQ364937    | CCAGCCTTTGCTCCAAGTA<br>C                      | TCTTCTTCCCTGGACCACA<br>C   | 201              |
| 24  | RM342   | 8,9   | 63.6                  | 55            | (CAT)12      | AF344166    | CCATCCTCCTACTTCAATG<br>AAG                    | ACTATGCAGTGGTGTCAAC<br>C   | 141              |
| 25  | RM117   | 12    | 28.1                  | 55            | (AG)7        | D24346      | CGATCCATTCTGCTGCTC<br>GCG                     | CGCCCCATGCATGAGAA<br>GACG  | 208              |
| 26  | RM262   | 2     | 64.6                  | 55            | (CT)16       | AF344081    | CATTCCGTCTCGGCTCAAC<br>T                      | CAGAGCAAGGTGGCTTGC         | 154              |
| 27  | RM588   | 6     | 7.4                   | 55            | (TGC)9       | AP000559    | GTTGCTCTGCCTCACTCTT<br>G                      | AACGAGCCAACGAAGCAG         | 126              |
| 28  | RM1089  | 5     | 69.2                  | 55            | (AC)33       | AY017760    | CAGAAGGATTATCTCGAT<br>ACC                     | AATAGGGCTTGAAATAAA<br>TTG  | 239              |
| 29  | RM447   | 8     | 100.4                 | 55            | (CTT)8       | AQ290369    | CCCTTGCTGTCTCCTCT<br>C                        | ACGGGCTTCTTCTCCTTCT<br>C   | 111              |
| 30  | RM1237  | 5     | 67.5                  | 55            | (AG)15       | AY017912    | CTCCGCGAGCTTTAGAAG<br>AG                      | CACATACTCTGGCTCTCCC<br>G   | 144              |
| 31  | RM25    | 8     | 23.5                  | 55            | (GA)18       | AF343842    | GGAAAGAATGATCTTTTCACTACCATCAAAACCAATGT<br>TGG | TC                         | 146              |
| 32  | RM1134  | 7     | 25.4                  | 50            | (AG)12       | AY017809    | ACACCCAACTTTTCTCACG<br>C                      | AGCTAGGGTTTCGATCTCC<br>C   | 144              |
| 33  | RM518   | 4     | 34.6                  | 55            | (TC)15       | AQ690034    | CTCTTCACTCACTCACCAT<br>GG                     | ATCCATCTGGAGCAAGCA<br>AC   | 171              |
| 34  | RM1253  | 7     | 44.4                  | 50            | (AG)16       | AY017928    | CTGAACTTGCCTGAGAACT<br>C                      | GACGACCTCTCCATGCTCG        | 175              |
| 35  | RM525   | 2     | 143.7                 | 55            | (AAG)12      | AQ794433    | GGCCCGTCCAAGAAATAT<br>TG                      | CGGTGAGACAGAATCCTTA<br>CG  | 131              |
| 36  | RM23865 | 9     |                       |               | (CT)10       |             | TCATCCCATTCTCTCCTC<br>ACC                     | CATACGGCCATACAAATG<br>AACC | 148              |

Table 2 Cont'd.

| S/n | Marker  | Chro. | Genetic distance (cM) | Anneal. temp. | Repeat Motif             | Genomic DNA | Primer Sequence (F)        | Primer Sequence (R)        | Exptd. band size |
|-----|---------|-------|-----------------------|---------------|--------------------------|-------------|----------------------------|----------------------------|------------------|
| 37  | RM8213  | 4     | 0                     | 55            | (TC)10                   | AL442113    | AGCCCAGTGATACAAAGA<br>TG   | GCGAGGAGATACCAAGA<br>AAG   | 177              |
| 38  | RM508   | 6     | 0                     | 55            | (AG)17                   | AQ577547    | GGATAGATCATGTGTGGG<br>GG   | ACCCGTGAACCACAAAGA<br>AC   | 235              |
| 39  | RM313   | 12    | 65.5                  | 55            | (GT)6CA(CG)<br>5-6-(GT)8 | AF344138    | TGCTACAAGTGTCTTCA<br>GGAC  | GCTCACCTTTTGTGTTCCA<br>C   | 111              |
| 40  | RM310   | 8     | 110.4                 | 55            | (GT)19                   | AF344135    | CCAAAACATTTAAAATAT<br>CATG | GCTTGTGTCATTACCAT<br>TC    | 105              |
| 41  | RM7376  | 12    | 23                    | 50            | (GAAA)6                  | AY024051    | TCACCGTCACCTCTTAAG<br>TC   | GGTGGTTGTGTTCTGTTG<br>G    | 195              |
| 42  | RM431   | 1     | 166.7                 | 55            | (AG)16                   | AQ272944    | TCCTGCGAACTGAAGAGT<br>TG   | AGAGCAAAACCCTGGTTC<br>AC   | 251              |
| 43  | RM1375  | 10    | 80.8                  | 50            | (AG)31                   | AY018050    | CTACACGCGCAAACCTCTG<br>TC  | ATGAAGGTCTAGGCTGCA<br>CC   | 180              |
| 44  | RM6293  | 11    | 117.3                 | 55            | (CTT)8                   | AY022968    | GGCTCGATCGATTGGATT<br>C    | TCACTAAAACGCGTTACG<br>GG   | 198              |
| 45  | RM241   | 4     | 102.3                 | 55            | (CT)31                   | AF344061    | GAGCCAAATAAGATCGCT<br>GA   | TGCAAGCAGCAGATTTAG<br>TG   | 158              |
| 46  | RM452   | 2     | 56.3                  | 55            | (GTC)9                   | AQ326476    | CTGATCGAGAGCGTTAAG<br>GG   | GGGATCAAACCACGTTTC<br>TG   | 209              |
| 47  | RM305   | 5     | 95.1                  | 55            | (GT)4+degene<br>r        | AF344130    | TACTGCCAAAGGCGAGCT<br>TC   | GTGAGAGGCTACAGCTAA<br>CC   | 203              |
| 48  | RM1     | 1,3   | 79.4                  | 55            | (GA)26                   |             | GCGAAAACACAATGCAA<br>AAA   | GCGTTGGTTGGACCTGAC         | 113              |
| 49  | RM6836  | 6     | 54.1                  | 55            | (TCT)14                  | AY023511    | TGTTGCATATGGTGCTAT<br>TTGA | GATACGGCTTCTAGGCCA<br>AA   | 240              |
| 50  | RM8225  | 6     | 54.1                  | 55            | A11N(AAG)1<br>4          |             |                            |                            | 221              |
| 51  | RM520   | 3     | 170.4                 | 55            | (AG)10                   | AQ690961    | AGGAGCAAGAAAAGTTC<br>CCC   | GCCAATGTGTGACGCAAT<br>AG   | 247              |
| 52  | OSR28   | 9     | 0                     | 55            | (AGA)n                   | D40471      | AGCAGCTATAGCTTAGCT<br>GG   | ACTGCACATGAGCAGAGA<br>CA   | 0                |
| 53  | RM28076 | 12    | 135                   |               | (CT)13                   |             | GGGACTTGGGACCAGTTT<br>ATGG | TCAGGTCTGTTGGATTCC<br>ATGC | 289              |
| 54  | RM219   | 9     | 108.6                 | 55            | (CT)17                   | AF344040    | CGTCGGATGATGTAAAGC<br>CT   | CATATCGGCATTGCGCTG         | 202              |

Table 2 Cont'd.

| S/n | Marker  | Chro.  | Genetic distance (cM) | Anneal temp. | Repeat Motif           | Genomic DNA | Primer Sequence (F)            | Primer Sequence (R)          | Exptd. band size |
|-----|---------|--------|-----------------------|--------------|------------------------|-------------|--------------------------------|------------------------------|------------------|
| 55  | RM544   | 8      | 34.2                  | 55           | (TC)9                  | AQ863302    | TGTGAGCCTGAGCAATAACG           | GAAGCGTGTGATATCGCAT<br>G     | 248              |
| 56  | RM261   | 4      | 0                     | 55           | C9(CT)8                | AF344080    | CTACTTCTCCCCTTGTGTCG           | TGTACCATCGCCAAATCTC<br>C     | 125              |
| 57  | RM5556  | 8      | 26                    | 55           | (TG)15                 | AY022231    | ATCTCCCTCCCTCTCCTCAC           | TCCACACCTTCACAGTTGA<br>C     | 102              |
| 58  | RM206   | 11     | 74.1                  | 55           | (CT)21                 | AF344027    | CCCATGCGTTTAACTATTCT           | CGTTCCATCGATCCGTATGG         | 147              |
| 59  | RM294A  | 1,10,8 | 95.9                  | 55           | {{(GT)3T2AG<br>GGACA}2 | AF344120    | TTGGCCTAGTGCCTCCAATC           | GAGGGTACAACCTTAGGACG<br>CA   | 173              |
| 60  | RM250   | 2      | 158.6                 | 55           | (CT)17                 | AF344070    | GGTTCAAACCAAGCTGATCA           | GATGAAGGCCTTCCACGCA<br>G     | 153              |
| 61  | RM402   | 6      | 44.4                  | 55           | (ATA)7                 | AQ050029    | GAGCCATGGAAAGATGCATG           | TCAGCTGGCCTATGACAAT<br>G     | 133              |
| 62  | RM5390  | 2      | 50.3                  | 55           | (TC)14                 |             |                                |                              | 148              |
| 63  | RM232   | 3      | 28.1                  | 55           | (CT)24                 | AF344052    | CCGGTATCCTTCGATATTGC           | CCGACTTTTCCTCCTGACG          | 158              |
| 64  | RM160   | 9      | 88.3                  | 55           | (GAA)23                |             |                                |                              | 131              |
| 65  | RM463   | 12     | 104.8                 | 55           | (TTAT)5                | AQ328446    | TTCCCCTCCTTTTATGGTGC           | TGTTCTCCTCAGTCACTGCG         | 192              |
| 66  | RM1973  | 7      | 70.8                  | 55           | (AT)19                 | AY018648    | GAGTTGCAAGGATATTTTAA           | TGGAGCCTAGAGAATACAT<br>A     | 143              |
| 67  | RM10025 | 1      | 395                   |              | (CTTT)5                |             | GCTTGAAGCATTTCATCTCCT<br>CTTCC | CGTGCATTGATTCCAAGAA<br>GATCC | 82               |
| 68  | RM6308  | 3      | 180                   | 55           | (CTT)9                 | AY022983    | TCGACCTGGCTCTCCTCTAG           | TATCAACCTGCTCCTCCTGG         | 104              |
| 69  | RM233A  | 2,5    | 16.3                  | 55           | (CT)20                 | AF344053    | CCAAATGAACCTACATGTTG           | GCATTGCAGACAGCTATTG<br>A     | 162              |
| 70  | SSR21   | 3      | 144.5                 | 55           | (CT)9                  | AC091494    | GTCCCACATGTCAGGATG             | ATCTGCTACTTGTGGAGGA<br>G     | 224              |

Table 2 Cont'd.

| S/n | Marker        | Chro. | Genetic distance (cM) | Anneal. temp. | Repeat Motif     | Genomic DNA | Primer Sequence (F)          | Primer Sequence (R)              | Exptd. band size |
|-----|---------------|-------|-----------------------|---------------|------------------|-------------|------------------------------|----------------------------------|------------------|
| 71  | SSR23         | 1     |                       | 55            | (TC)22           | AP003227    | GCGTAAGATCTCCCTACCA<br>C     | CAACACATGATAGCACATG<br>G         | 211              |
| 72  | SSR13         | 1     | 103.4                 | 55            | (GT)31(AT)3<br>0 | AP002839    | GCAGAAAATTTCATTAG<br>CATCT   | GGATATGACTTACTACTGC<br>AACAAATCT | 291              |
| 73  | SSR26         | 1     | 25                    | 55            | (TAT)5           | AP004317    | AATCTAACGTTTGACTATC<br>CATC  | TCTACCAGTACTCCCTTCAC<br>C        | 192              |
| 74  | RM13          | 5     | 28.6                  | 55            | (GA)6-<br>(GA)16 | AF344014    | TCCAACATGGCAAGAGAGA<br>G     | GGTGGCATTTCGATTCCAG              | 141              |
| 75  | Xa-<br>13prom | 8     |                       |               | -                | -           | GGCCATGGCTCAGTGT<br>T        | GAGCTCCAGCTCTCCAAAT<br>G         |                  |
| 76  | RM21          | 11    | 85.7                  | 55            | (GA)18           | AF344021    | ACAGTATTCCGTAGGCACG<br>G     | GCTCCATGAGGGTGGTAGA<br>G         | 157              |
| 77  | Xa21FR        | 12    |                       |               | -                |             | TCCAACATGGCAAGAGAGA<br>G     | GGTGGCATTTCGATTCCAG              |                  |
| 78  | pTA248        | 11    | 95.8                  |               | -                |             | AGACGCGGAAGGGTGGTTC<br>CCGGA | AGACGCGGTAATCGAAGAT<br>GAAA      |                  |
| 79  | MP            | 4     |                       |               | -                |             | ATCGATCGATCTTCACGAG<br>G     | TCGTATAAAAGGCATTCCG<br>G         |                  |

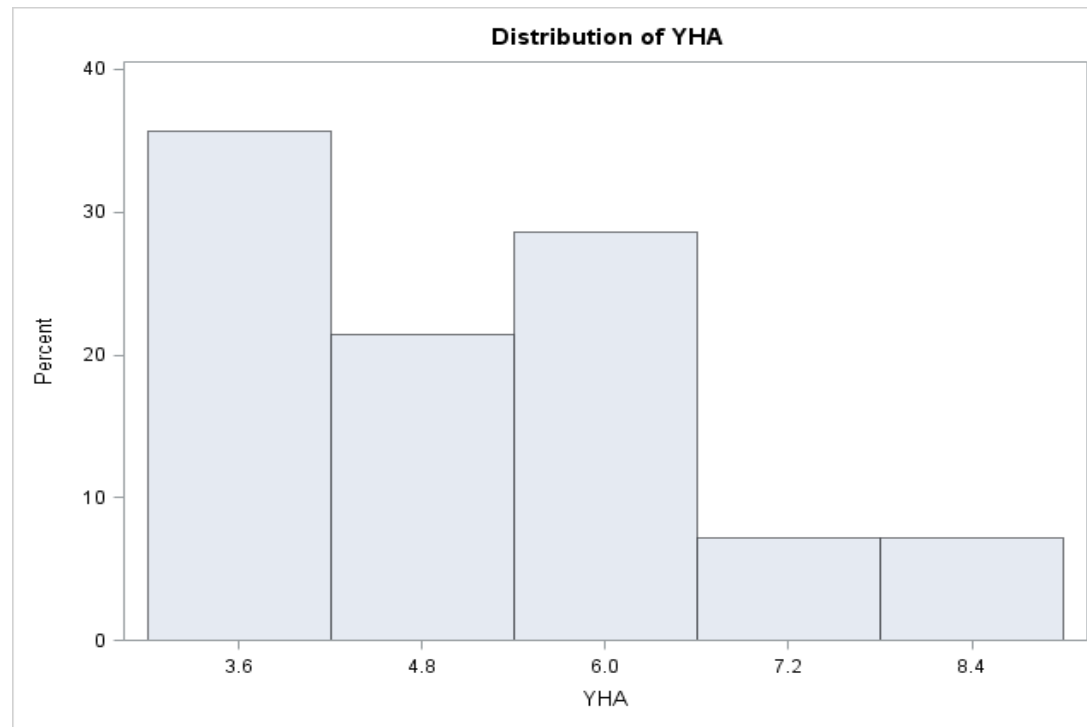

**Figure S1.** Histogram of yield/ha of the selected lines.

Note: YHA=yield per hectare (tons/ha)

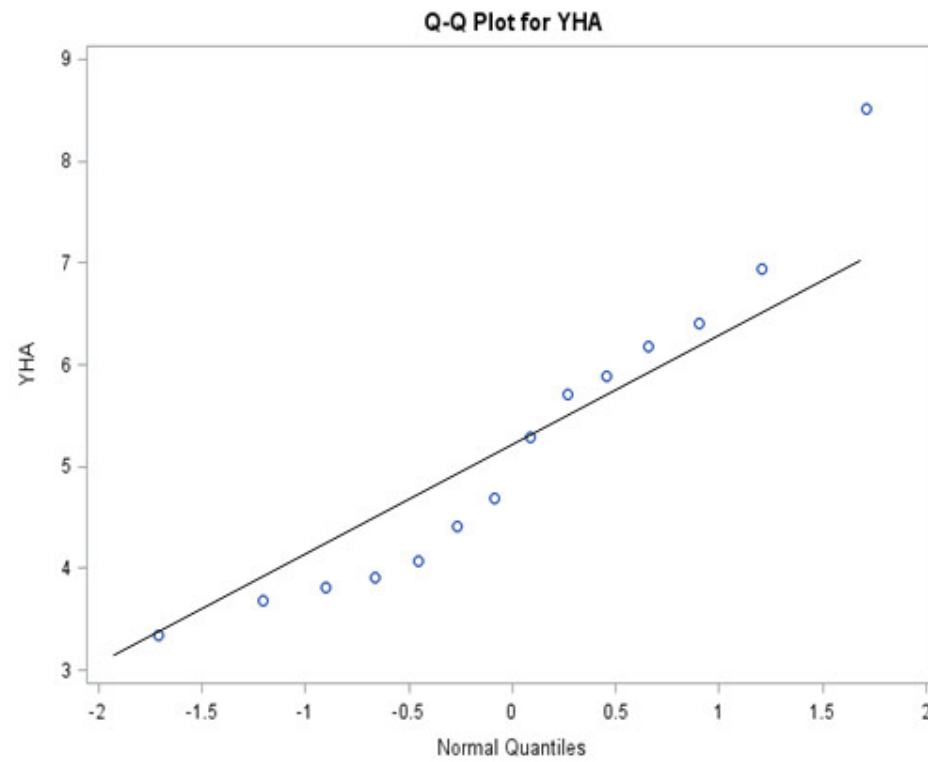

**Figure S2.** Normal quantile-quantile (Q-Q) plot for yield/ha of the selected lines.

Note: YHA=yield per hectare (tons/ha)
